# Supplementary material for: Parent-led communication therapy for bilingual families of autistic children: A scoping review protocol
Source: Research Square preprint supplement (doi:10.21203/rs.3.rs-2495103/v1), 2023-01-25
Supplement: Supplementary file 1 [file 52b5bfbb98240c6849f81f17.pdf]

## Appendix A      Search Levels

|         |                        |                                                                                                                                                                       |
|---------|------------------------|-----------------------------------------------------------------------------------------------------------------------------------------------------------------------|
| Level 1 | Developmental disorder | “development* disorder” OR autis* OR “autism spectrum” OR “asd”                                                                                                       |
| Level 2 | Early intervention     | “early intervention” OR p?ediatric OR child* OR infant OR toddler OR pre?school OR “young child*” OR “early years”                                                    |
| Level 3 | Communication therapy  | “language acquisition” OR “language development*” OR “social?comm*” OR “pragmatic*” OR “communication” OR “interaction*”                                              |
| Level 4 | Parent-led             | “parent-led” OR “self-directed” OR “parent-mediated” OR “parent-implemented” OR “parent-delivered” OR “parent training” OR “caregiver training”                       |
| Level 5 | Bilingual              | Bilingual* OR multilingual* OR “heritage language*” OR “first language” OR “home language” OR “community language” OR “culturally and linguistically diverse” OR CALD |
